# Supplementary material
Source: publisher site journal article supplement (https://www.dovepress.com/article/509094)
Supplement: Supplementary file 1 [file get_supplementary_file.php]

Supplement table 1. Comprehensive Performance Metrics of the XGBoost Classifier for ADHD Classification

| **Performance metrics** | **Values** |
| --- | --- |
| Accuracy | 0.9081 |
| F1 Score | 0.9347 |
| Precision | 0.9258 |
| Recall | 0.9437 |
| Specificity | 0.8264 |

Abbreviations: ADHD, Attention-Deficit/Hyperactivity

Supplement table 2. Mean SHAP Values for Beta/Theta Frequency Variations Across Electrode Sites in ADHD Classification

| **Features** | **mean (|SHAP value|)** |
| --- | --- |
| Fp1-β/θ | 0.0142 |
| Fp2-β/θ | 0.0019 |
| F3-β/θ | 0.0225 |
| F4-β/θ | 0.2452 |
| C3-β/θ | 0.3835 |
| C4-β/θ | 0.1667 |
| P3-β/θ | 0.0141 |
| P4-β/θ | 0.0293 |
| O1-β/θ | 0.0046 |
| O2-β/θ | 0.1705 |
| F7-β/θ | 0.0691 |
| F8-β/θ | 0.0144 |
| T7-β/θ | 0.0027 |
| T8-β/θ | 0.0058 |
| P7-β/θ | 0.0212 |
| P8-β/θ | 0.1973 |
| Fz-β/θ | 0.0172 |
| Cz-β/θ | 0.0214 |
| Pz-β/θ | 0.0814 |
| Fp1-Low β/θ | 0.3662 |
| Fp2-Low β/θ | 0.0331 |
| F3-Low β/θ | 0.0696 |
| F4-Low β/θ | 0.1317 |
| C3-Low β/θ | 0.1435 |
| C4-Low β/θ | 0.1332 |
| P3-Low β/θ | 0.1653 |
| P4-Low β/θ | 0.0014 |
| O1-Low β/θ | 0.0156 |
| O2-Low β/θ | 0.5385 |
| F7-Low β/θ | 0.3133 |
| F8-Low β/θ | 0.0223 |
| T7-Low β/θ | 0.0620 |
| T8-Low β/θ | 0.1361 |
| P7-Low β/θ | 0.0329 |
| P8-Low β/θ | 0.0045 |
| Fz-Low β/θ | 0.0263 |
| Cz-Low β/θ | 0.0000 |
| Pz-Low β/θ | 0.1241 |
| Fp1-Middle β/θ | 0.0452 |
| Fp2-Middle β/θ | 0.0213 |
| F3-Middle β/θ | 0.0072 |
| F4-Middle β/θ | 0.2033 |
| C3-Middle β/θ | 0.0094 |
| C4-Middle β/θ | 0.0250 |
| P3-Middle β/θ | 0.0446 |
| P4-Middle β/θ | 0.0000 |
| O1-Middle β/θ | 0.3251 |
| O2-Middle β/θ | 1.0122 |
| F7-Middle β/θ | 0.0607 |
| F8-Middle β/θ | 0.2375 |
| T7-Middle β/θ | 0.0055 |
| T8-Middle β/θ | 0.0882 |
| P7-Middle β/θ | 0.0702 |
| P8-Middle β/θ | 0.0751 |
| Fz-Middle β/θ | 0.0373 |
| Cz-Middle β/θ | 0.2648 |
| Pz-Middle β/θ | 0.0228 |

Abbreviations: SHAP, SHapley Additive exPlanations; ADHD, Attention-Deficit/Hyperactivity


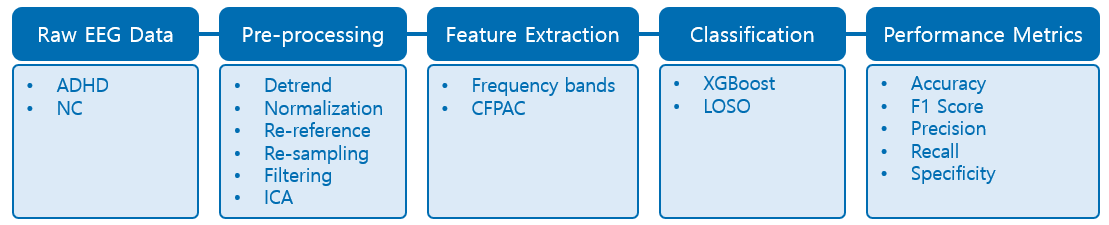


**Figure S1.** Workflow of the EEG-Based Machine Learning Pipeline for ADHD Classification
